# Supplementary material
Source: HighWire-hosted journal article supplement (http://www.ajnr.org/highwire/filestream/90144/field_highwire_adjunct_files/1/1118_part_2.pdf)
Supplement: 1118_part_2.pdf [file 1118_part_2.pdf]

**Online Supplemental Table 2: Prediction performance of pretraining, separate, and thresholding approach<sup>a</sup>**

|                       | Minimal Reperfusion (n = 33) |                  |                        |                                 | Major Reperfusion (n = 67) |                  |                        |                                 |
|-----------------------|------------------------------|------------------|------------------------|---------------------------------|----------------------------|------------------|------------------------|---------------------------------|
|                       | AUC                          | DSC              | Volume Difference (mL) | Absolute Volume Difference (mL) | AUC                        | DSC              | Volume Difference (mL) | Absolute Volume Difference (mL) |
| Pretraining approach  | 0.92 (0.89–0.95)             | 0.60 (0.43–0.70) | 4 (–61–33)             | 50 (22–77)                      | 0.94 (0.89–0.97)           | 0.57 (0.30–0.69) | 0 (–15–10)             | 11 (6–28)                       |
| Separate approach     | 0.88 (0.84–0.91)             | 0.55 (0.41–0.69) | 7 (–52–36)             | 52 (18–134)                     | 0.92 (0.85–0.97)           | 0.49 (0.35–0.66) | 0 (–15–15)             | 15 (5–27)                       |
| P value               | <.001                        | .04              | .3                     | .3                              | <.001                      | .04              | .1                     | .1                              |
| Thresholding approach | 0.80 (0.75–0.84)             | 0.56 (0.42–0.65) | 7 (–71–52)             | 60 (22–98)                      | 0.77 (0.70–0.82)           | 0.46 (0.16–0.54) | –8 (–33–6)             | 12 (7–33)                       |
| P value               | <.001                        | .008             | .6                     | .2                              | <.001                      | <.001            | <.001                  | .05                             |

<sup>a</sup>Data are expressed as median (IQR). Paired comparisons were made between pretraining and separate approaches and pretraining and the thresholding approach. In patients with minimal reperfusion, the thresholding approach used the union of Tmax > 6 seconds and ADC < 620 × 10<sup>-6</sup> mm<sup>2</sup>/s; in patients with major reperfusion, the thresholding approach used the ADC < 620 × 10<sup>-6</sup> mm<sup>2</sup>/s.
